# Supplementary material
Source: PubMed Central journal article supplement (PMC2151675)

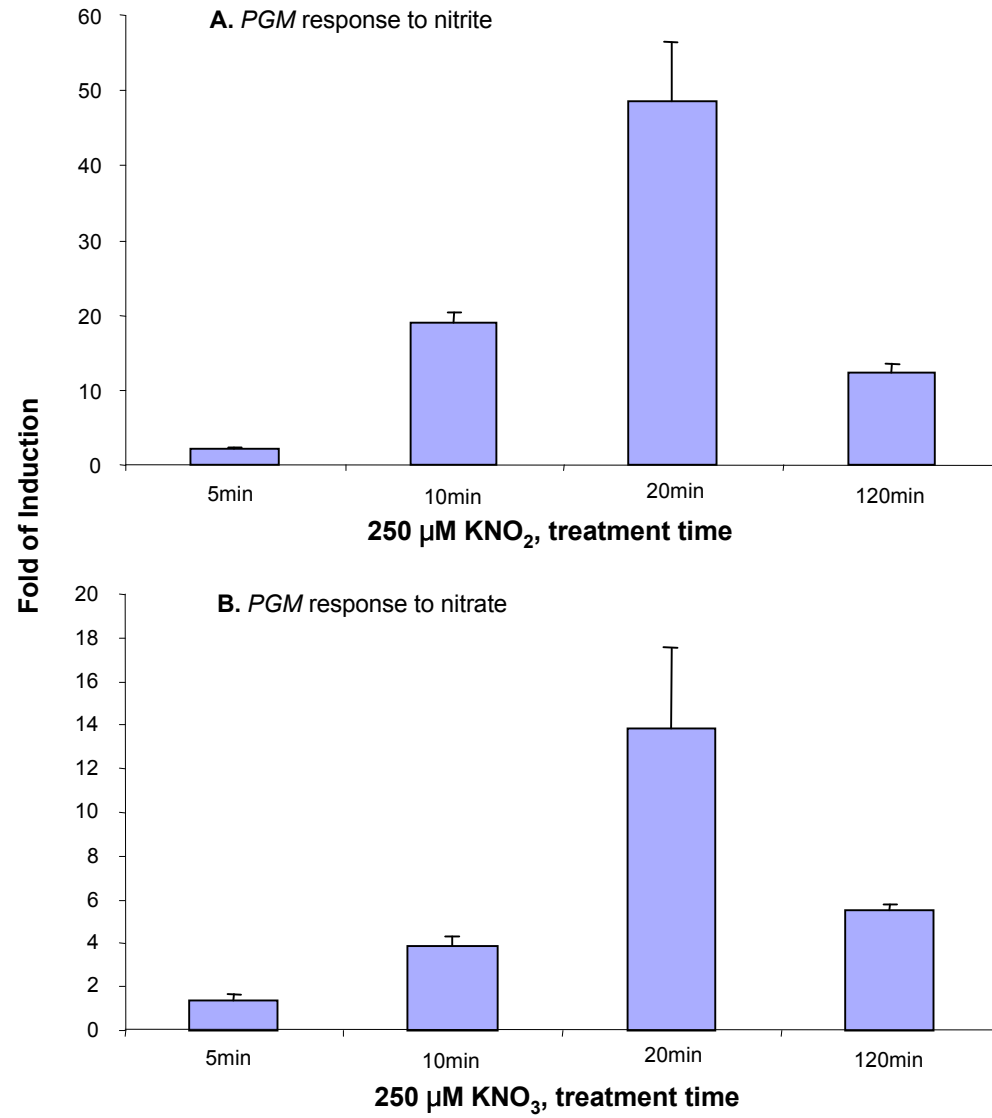

Supp. Fig. 1

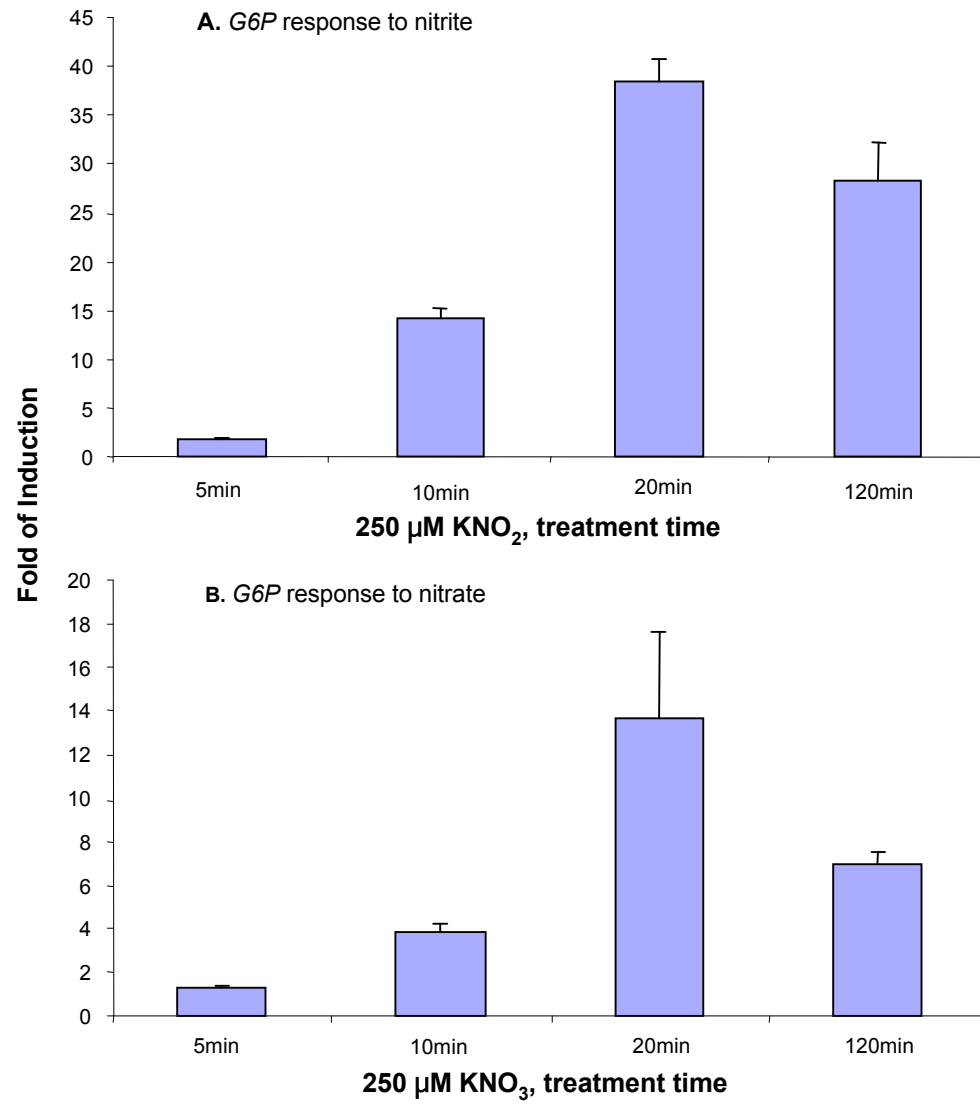

Supp. Fig. 2

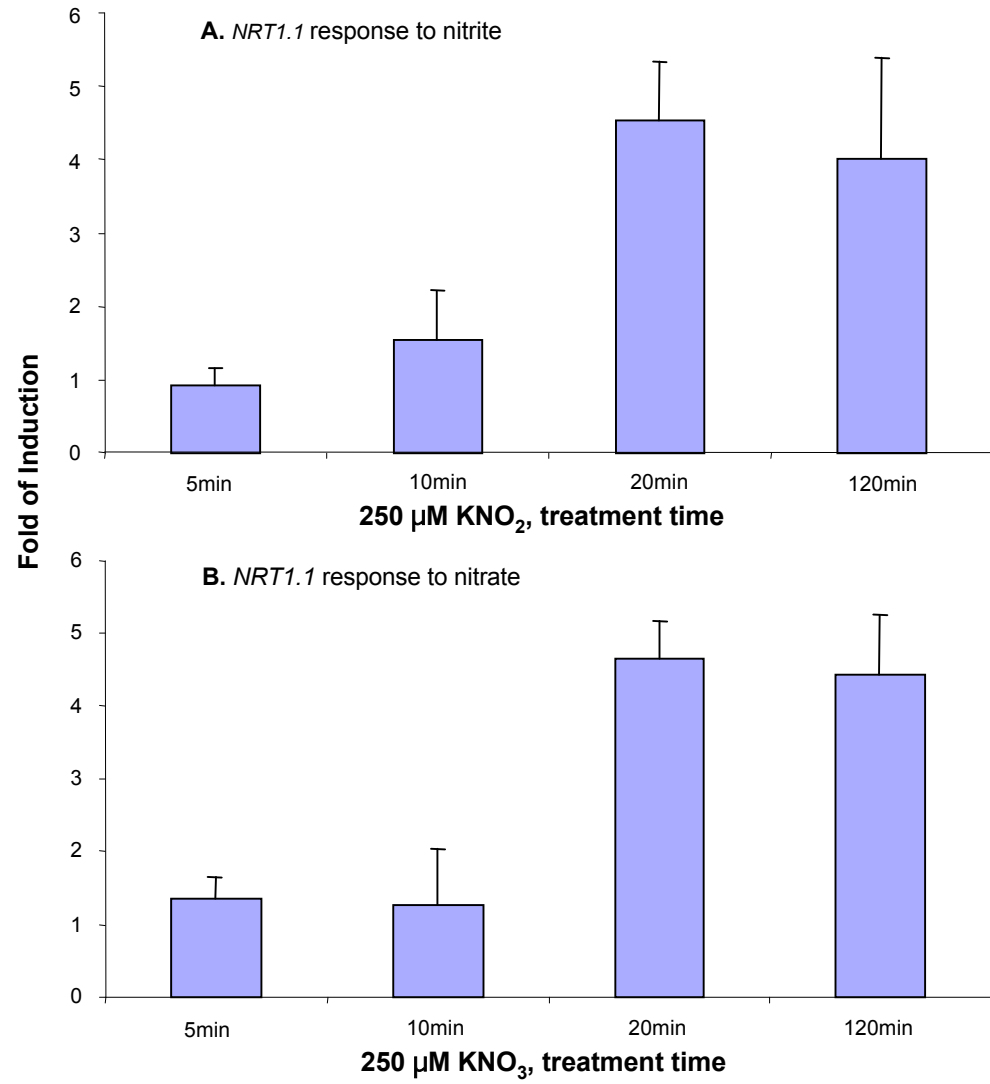

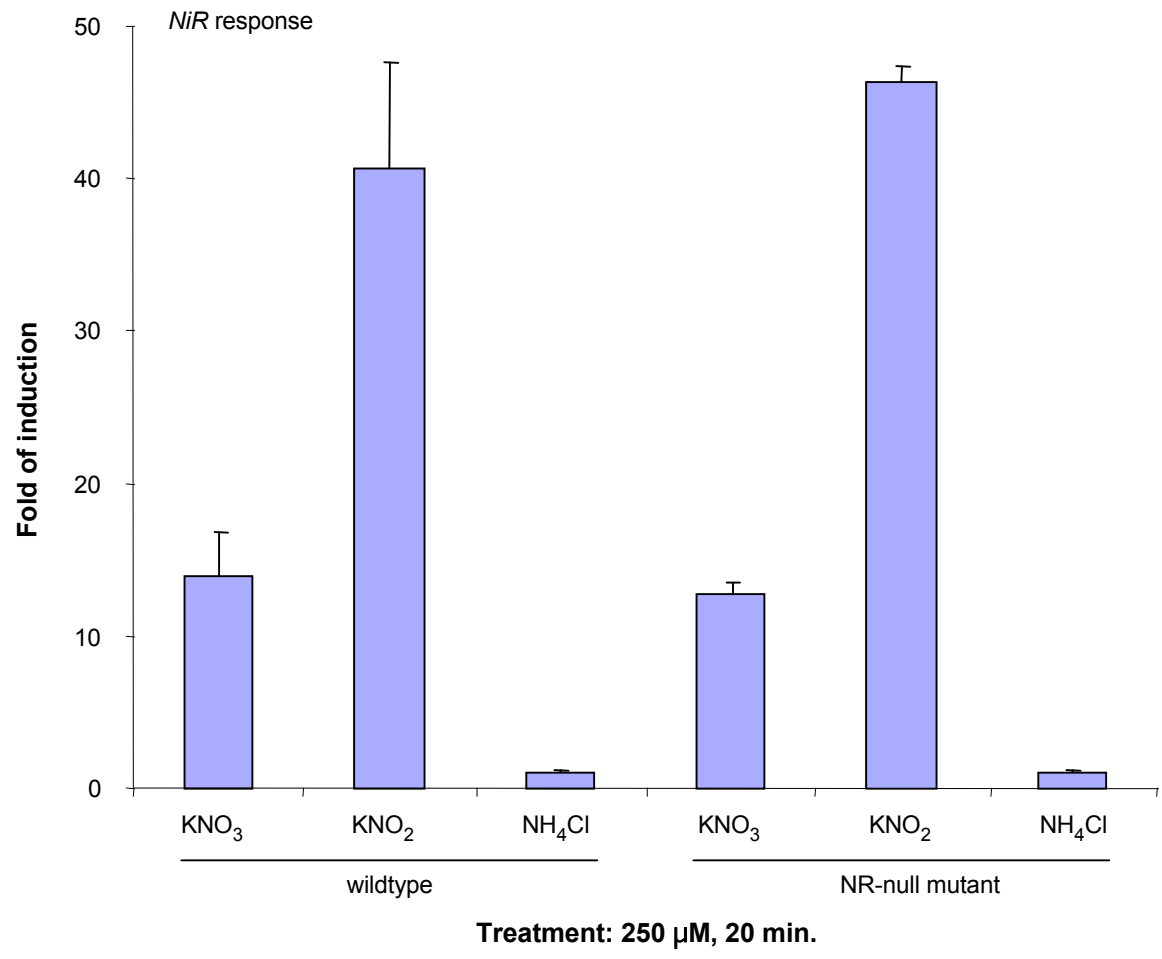

Supp. Fig. 4

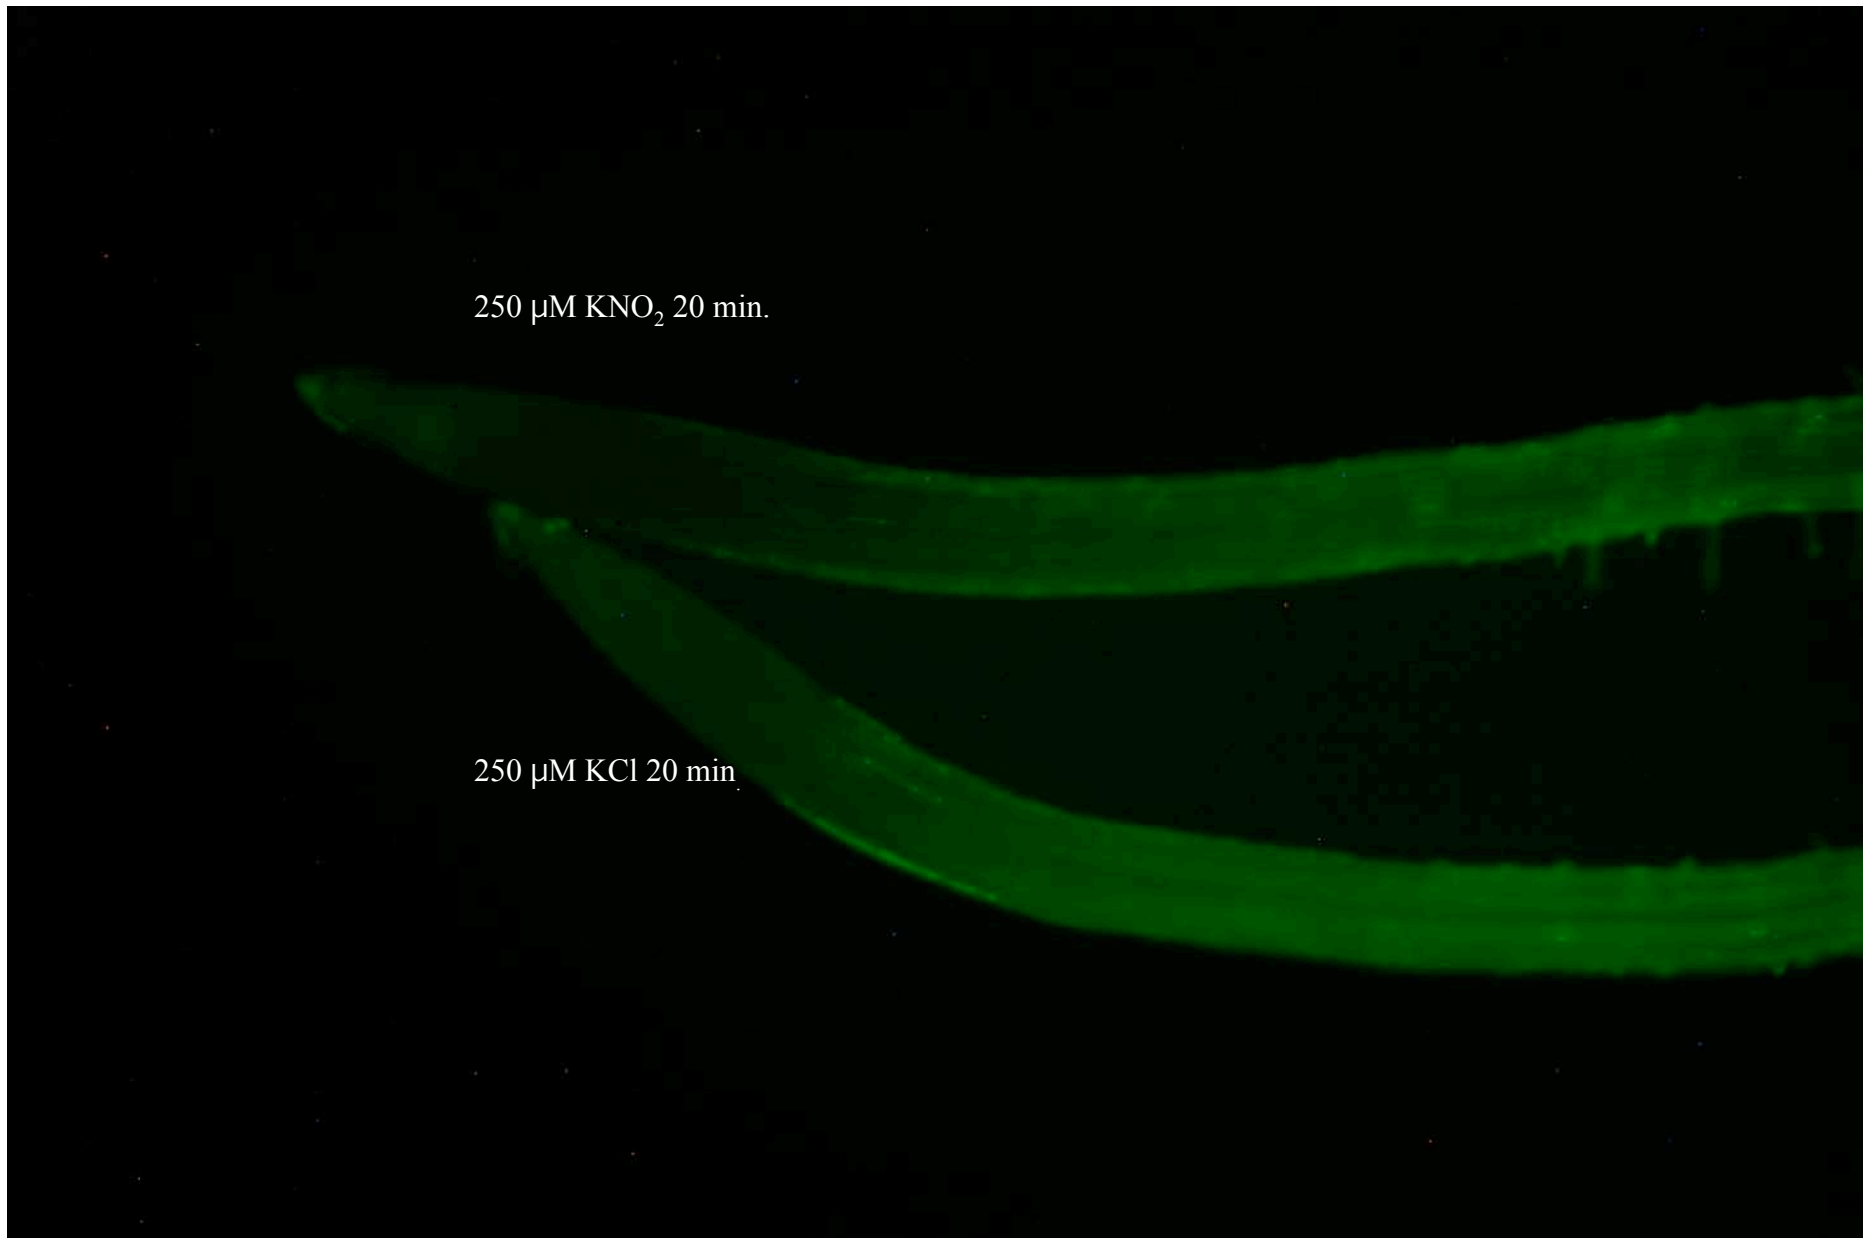

Supp. Fig. 5

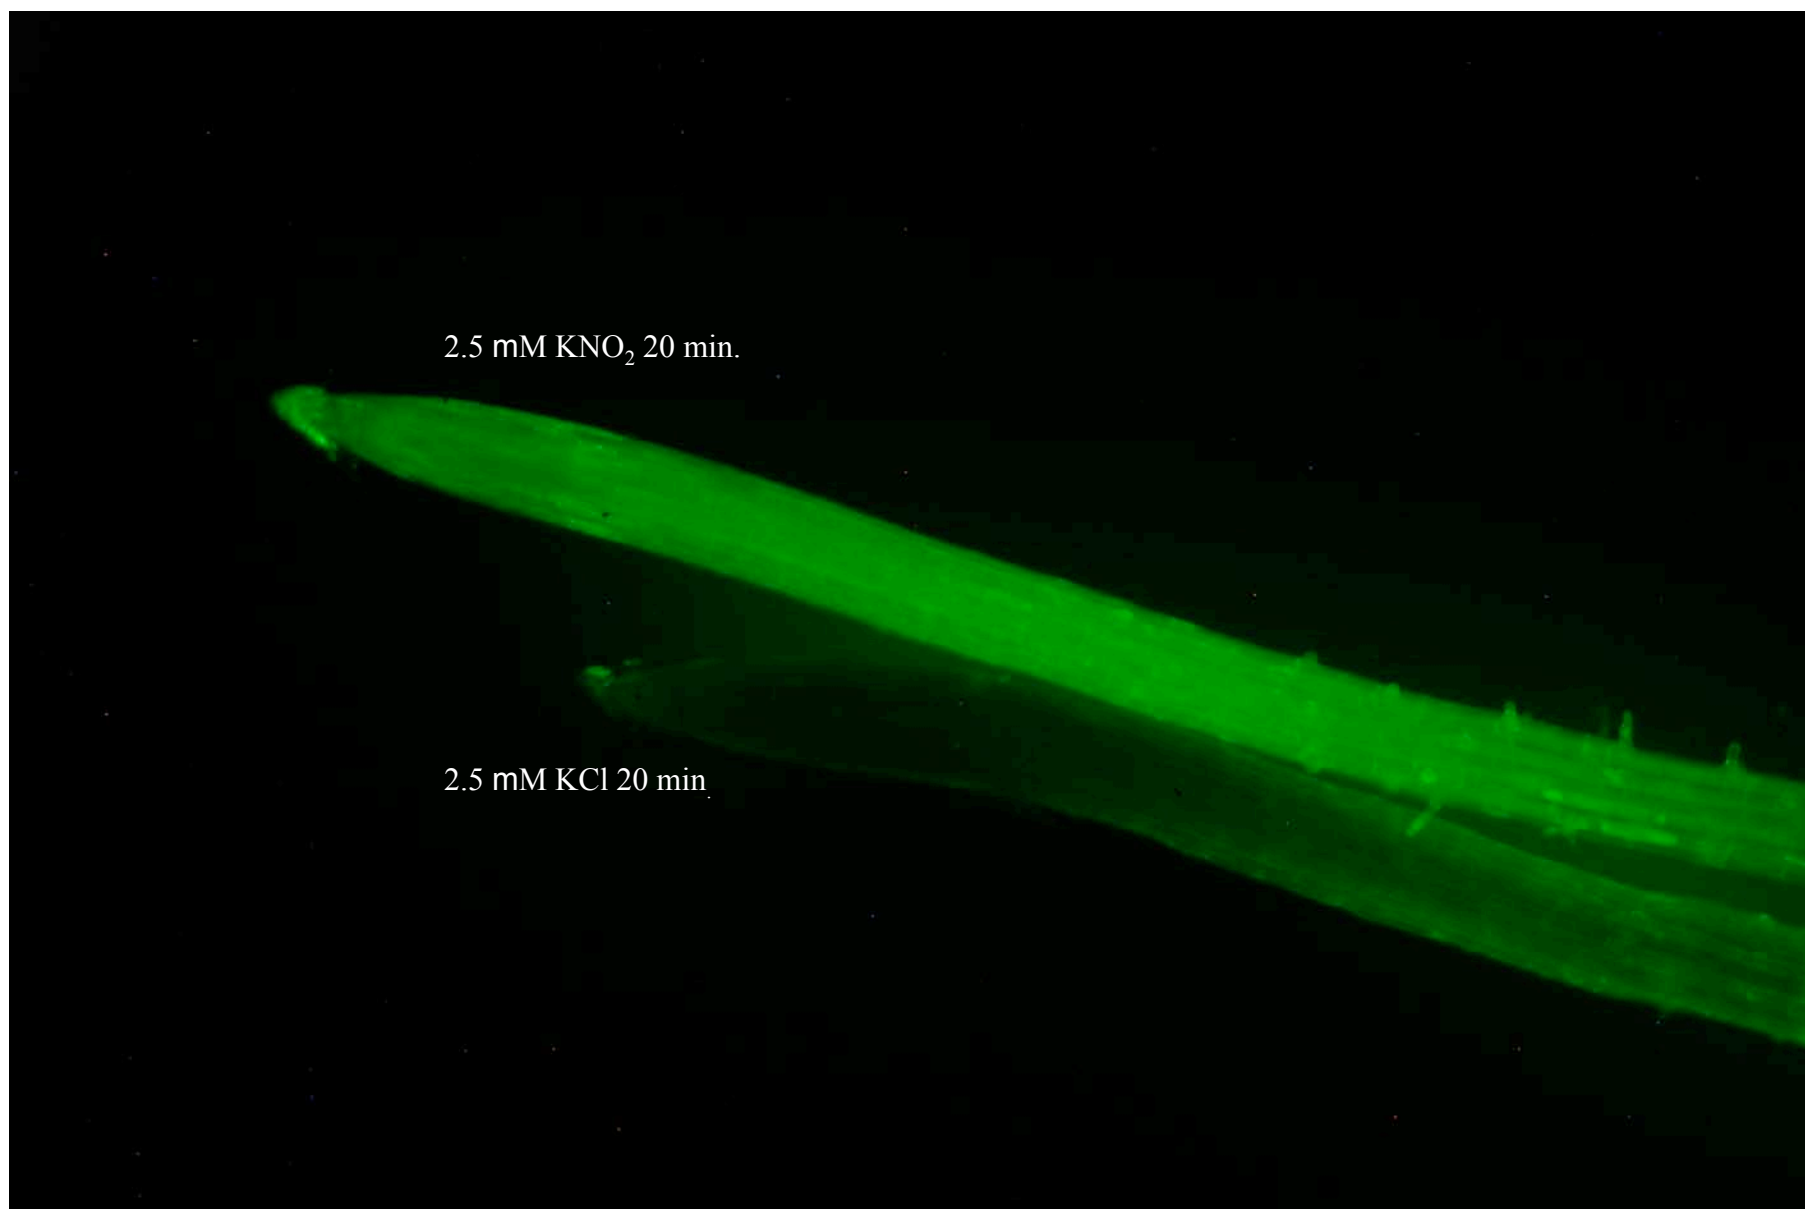

Supp. Fig. 6

Supplement: plntphys_pp.107.108944_1.pdf [file plntphys_pp.107.108944_1.pdf]
